# Supplementary material for: Unifying Long-Term Plasticity Rules for Excitatory Synapses by Modeling Dendrites of Cortical Pyramidal Neurons
Source: PubMed Central journal article supplement (PMC6941234; doi:10.1016/j.celrep.2019.11.068), 2019-12-24
Supplement: mmc1.pdf [file mmc1.pdf]

**Cell Reports, Volume 29**

**Supplemental Information**

**Unifying Long-Term Plasticity Rules  
for Excitatory Synapses by Modeling  
Dendrites of Cortical Pyramidal Neurons**

**Christian Ebner, Claudia Clopath, Peter Jedlicka, and Hermann Cuntz**

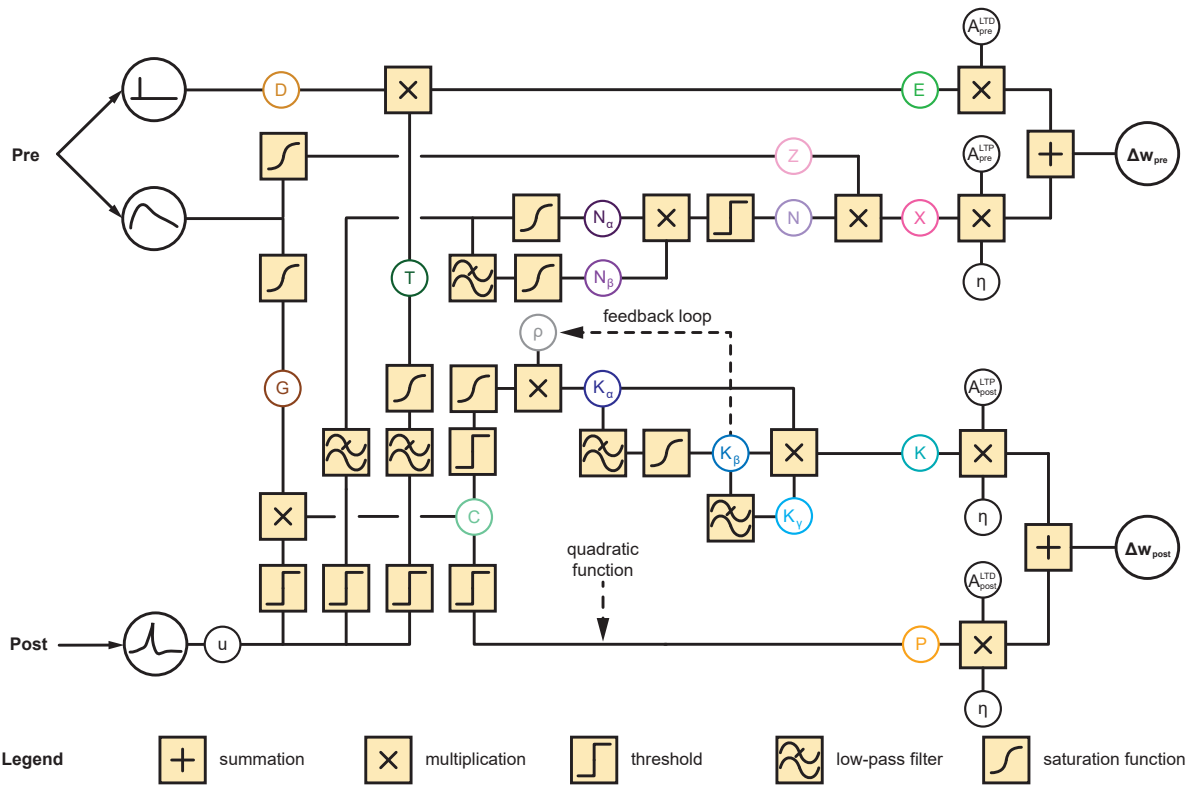

Figure S1. Plasticity model overview. Related to Figure 1 and STAR\*Methods. Calculations carried out within the model are illustrated in a flow diagram, starting with raw pre and post signals on the left and leading to synaptic weight change on the right. Variables are color-coded as according to Figure 1 in the main text. Results of summations and multiplications are always located on the right of their respective symbols.

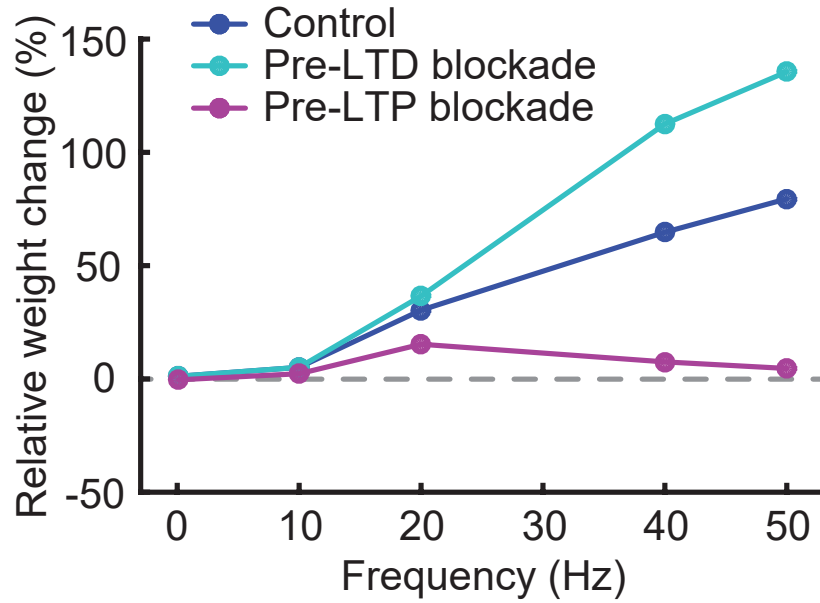

Figure S2. Blockade of presynaptic plasticity. Related to Figure 2. Model results are plotted as relative weight changes at a proximal location for different intra-burst frequencies. Pre- and postsynaptic bursts were shifted by +10 ms. The control condition (blue) equals model data of Figure 2B (right panel) in the main text, here compared to blockade of either pre-LTD (cyan) or pre-LTP (purple).

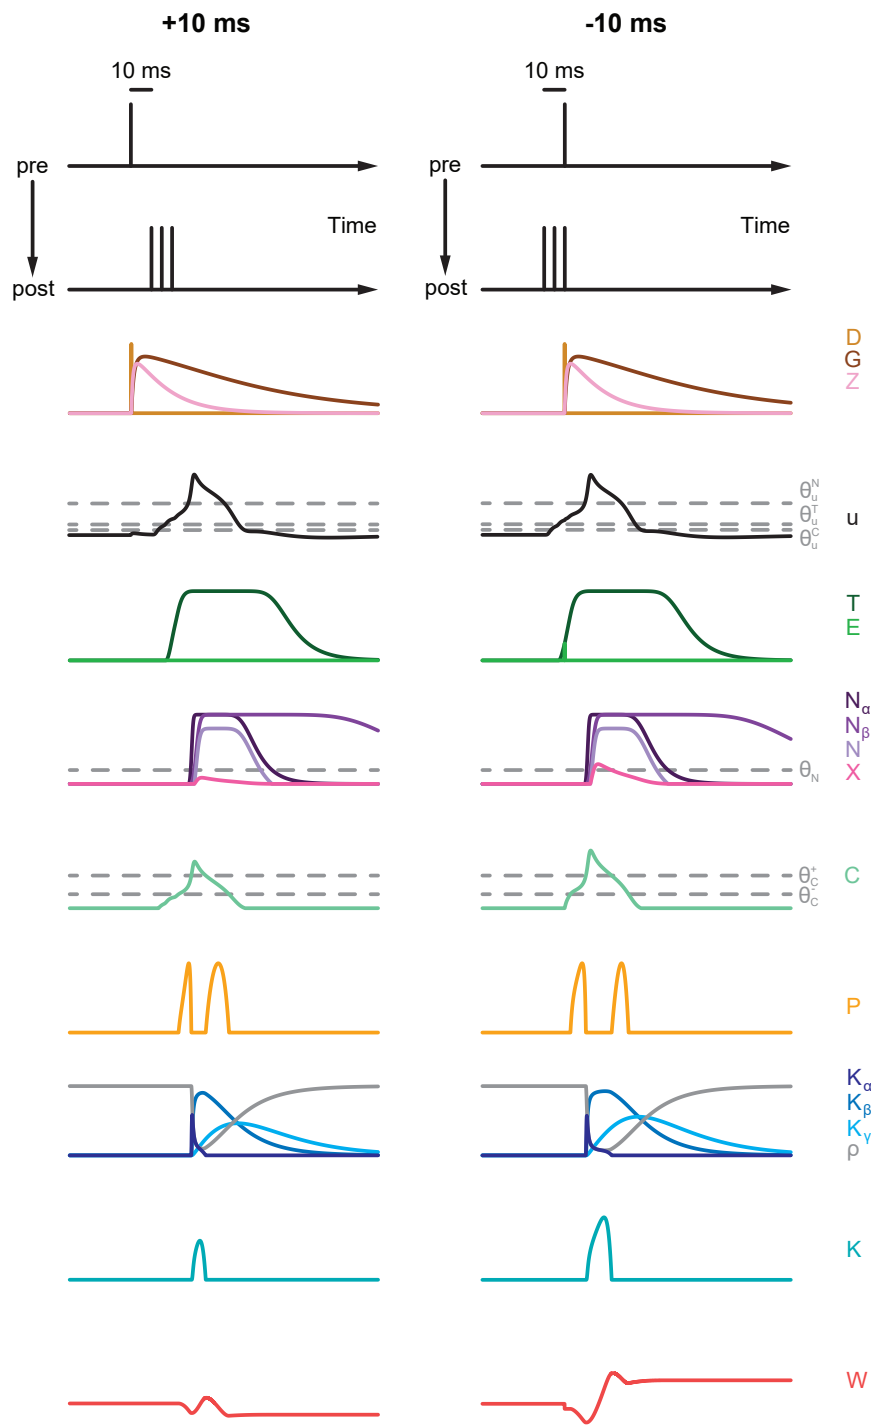

Figure S3. Model traces at distal locations in the burst-induced dendritic spike protocol. Related to Figure 4. Traces are drawn as according to Figure 1C in the main text. Note the delay between the somatic current injection (post trace, three spikes) and the peak of the dendritic spike at the synapse location, seen in the trace  $u$ .

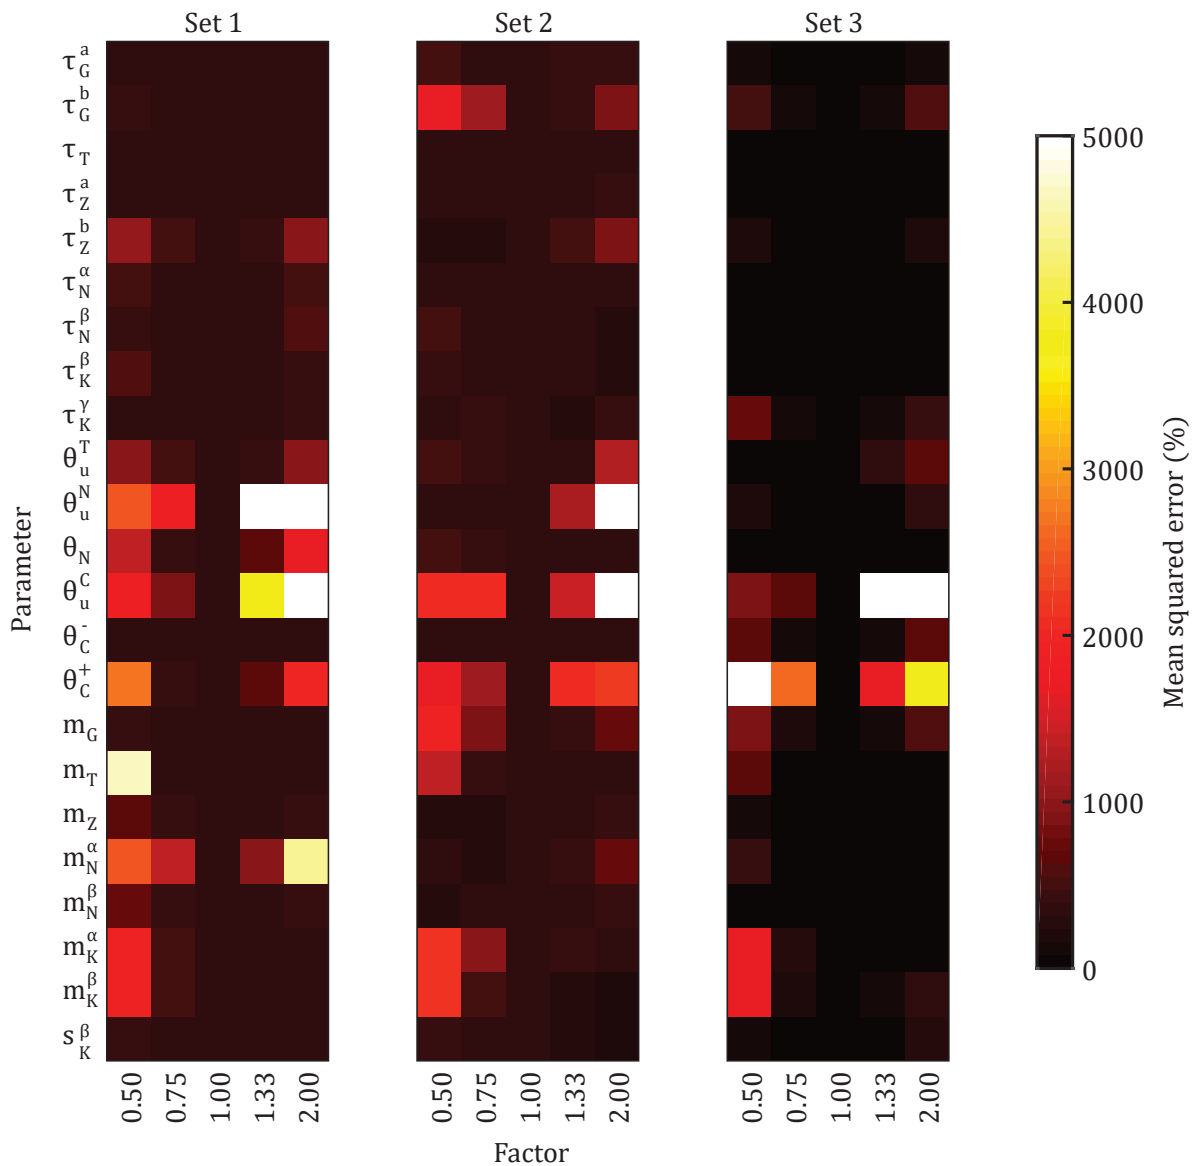

Figure S4. Sensitivity analysis. Related to STAR\*Methods. Sensitivity matrices showing the mean squared errors (color-coded, percent weight change) compared to original experimental data following reductions or increases of core parameters (y-axis) by four different factors besides the original fit (x-axis). Sets indicate plasticity amplitudes (see Table S1), tested against the respective experimental data (set 1: Sjöström et al., 2001; set 2: Nevian & Sakmann, 2006; set 3: Letzkus et al., 2006).

| Parameter           | Set 1               | Set 2               | Set 3               | Description                                                    |
|---------------------|---------------------|---------------------|---------------------|----------------------------------------------------------------|
| $A_{pre}^{LTD}$     | $3 \cdot 10^{-3}$   | $2.8 \cdot 10^{-3}$ | $1.5 \cdot 10^{-3}$ | Amplitude of pre-LTD                                           |
| $A_{pre}^{LTP}$     | $33 \cdot 10^{-4}$  | $13 \cdot 10^{-4}$  | $2.5 \cdot 10^{-4}$ | Amplitude of pre-LTP                                           |
| $A_{post}^{LTD}$    | $3.6 \cdot 10^{-4}$ | $3.6 \cdot 10^{-4}$ | $7.5 \cdot 10^{-4}$ | Amplitude of post-LTD                                          |
| $A_{post}^{LTP}$    | $20 \cdot 10^{-2}$  | $57 \cdot 10^{-2}$  | $7.8 \cdot 10^{-2}$ | Amplitude of post-LTP                                          |
| $\tau_G^a(ms)$      |                     | 2                   |                     | Rise time constant of $G$                                      |
| $\tau_G^b(ms)$      |                     | 50                  |                     | Decay time constant of $G$                                     |
| $\tau_T(ms)$        |                     | 10                  |                     | Low-pass filter time constant to calculate $\bar{T}$           |
| $\tau_Z^a(ms)$      |                     | 1                   |                     | Rise time constant of $Z$                                      |
| $\tau_Z^b(ms)$      |                     | 15                  |                     | Decay time constant of $Z$                                     |
| $\tau_N^\alpha(ms)$ |                     | 7.5                 |                     | Low-pass filter time constant to calculate $\bar{N}_\alpha$    |
| $\tau_N^\beta(ms)$  |                     | 30                  |                     | Low-pass filter time constant to calculate $\bar{N}_\beta$     |
| $\tau_K^\beta(ms)$  |                     | 15                  |                     | Low-pass filter time constant to calculate $\bar{K}_\beta$     |
| $\tau_K^\gamma(ms)$ |                     | 20                  |                     | Low-pass filter time constant to calculate $K_\gamma$          |
| $\theta_u^T$        |                     | -60                 |                     | Threshold applied to $u$ to calculate $\bar{T}$                |
| $\theta_u^N$        |                     | -30                 |                     | Threshold applied to $u$ to calculate $\bar{N}_\alpha$         |
| $\theta_N$          |                     | 0.2                 |                     | Threshold applied to $N_\alpha \cdot N_\beta$ to calculate $N$ |
| $\theta_u^C$        |                     | -68                 |                     | Threshold applied to $u$ to calculate $C$                      |
| $\theta_C^-$        |                     | 15                  |                     | Lower threshold applied to $C$                                 |
| $\theta_C^+$        |                     | 35                  |                     | Upper threshold applied to $C$                                 |
| $m_G$               |                     | 10                  |                     | Slope of the saturation function leading to $G$                |
| $m_T$               |                     | 1.7                 |                     | Slope of the saturation function leading to $T$                |
| $m_Z$               |                     | 6                   |                     | Slope of the saturation function leading to $Z$                |
| $m_N^\alpha$        |                     | 2                   |                     | Slope of the saturation function leading to $N_\alpha$         |
| $m_N^\beta$         |                     | 10                  |                     | Slope of the saturation function leading to $N_\beta$          |
| $m_K^\alpha$        |                     | 1.5                 |                     | Slope of the saturation function leading to $K_\alpha$         |
| $m_K^\beta$         |                     | 1.7                 |                     | Slope of the saturation function leading to $K_\beta$          |
| $s_K^\beta$         |                     | 100                 |                     | Scaling factor for $K_\beta$                                   |

Table S1. Related to STAR★Methods. Parameters for the plasticity rule.
